# Supplementary material for: PCR-Based Strategy for Introducing CRISPR/Cas9 Machinery into Hematopoietic Cell Lines
Source: MDPI journal article supplement (doi:10.3390/cancers15174263), 2023-08-25

**Supplemental Table S1.** Sequences of the sgRNA used to target IDH2 and MYBL2 and the ssODN sequence.

| sgRNA            | Sequence (5'-3')                                                                                       |
|------------------|--------------------------------------------------------------------------------------------------------|
| MYBL2            | TTGGCAGCTGGCTCCCTC                                                                                     |
| IDH2_1           | TGGACCAAGCCCATCACCAT                                                                                   |
| IDH2_2           | CTGGCCTACCTGGTCGCCAT                                                                                   |
| IDH2_R172K ssODN | tgcaaaaacatcccacgcctagtcctggctggactaaaccgataacgatcggaaa<br>gcacgcgcatggcgaccaggtaggccaggggtggagaggggat |

**Supplemental Table S2.** Primers sequence for sgRNA constructs. sgRNA sequence should be added to Primer FusionPCR\_1F and FusionPCR\_2R sequence in 5' (sgRNA forward sequence in FusionPCR\_1F and sgRNA reverse sequence in FusionPCR\_2R).

| Name         | Sequence (5'-3')                                |
|--------------|-------------------------------------------------|
| FusionPCR_1F | GTTTTAGAGCTAGAAATAGCAAG                         |
| FusionPCR_1R | CCGGCAGACGACGATTTATGACGGAAAAAGCACCGACTCGGTGCCAC |
| FusionPCR_2F | AAAAACCTCCCACACCTCC                             |
| FusionPCR_2R | GGTGTTCGTCCTTTCCACAA                            |
| FusionPCR_3F | GTTGTGGTTTGTCCAACTC                             |
| FusionPCR_3R | CCGGCAGACGACGATTTATGACGG                        |
| FusionPCR_4F | GGGTCATTAGTTCATAGCCC                            |
| FusionPCR_4R | GGTGTTCGTCCTTTCCACAA                            |
| FusionPCR_5F | AGCCCATATATGGAGTTCCG                            |

**Supplemental Table S3.** Primers used in PCR 1 for library preparation.

| Off-target | Primer Forward (5'-3') | Primer Reverse (5'-3') |
|------------|------------------------|------------------------|
| sgRNA1_1   | GATGATTGCCATAGCCTCAG   | ATCCTATCTCCCACACTGTG   |
| sgRNA1_2   | GTACTCTAGCCTGGTGACAG   | AGAATGGGAGGGGGAATAAG   |
| sgRNA1_3   | AGAGGTCATCTGTGTCCAGG   | CTGGGACTCGGCCTTCTGAA   |
| sgRNA1_4   | TGAAAGGAGGGTGAGCCG     | GAAGGTTCCCCCTCATTTG    |
| sgRNA1_5   | AGTATCACTGGCATCTCTGC   | CTGAGGAGGCCAGAATGACT   |
| sgRNA1_6   | CCATATGGGAGGGCGGTAGC   | CAGAACAGATTCCCCACAG    |
| sgRNA1_7   | CCTACCAGTGGAGCCTTGAG   | GCTTCGATCCTGTTCCCTCC   |
| sgRNA1_8   | TGTTGGACTAGATCACTCTG   | GCCCTTAGAGGGTAAACAAC   |
| sgRNA1_9   | CGCCAGGTCTGCAATGGAAG   | GCCTCTGTGAACTCTCCTC    |
| sgRNA1_10  | GCCCTGTCAATGAAGTGAAG   | CCACAAATGGCTGCAGAAAC   |

|                                     |                                    |                       |
|-------------------------------------|------------------------------------|-----------------------|
| sgRNA1_11                           | AAGGCCCTGTCAATGAACTG               | TTCACTGCTAGGTTTGCCAC  |
| sgRNA1_12                           | GTTGGGATTACAGGTATGAG               | TAGTCAAGGTCTTATTGCAC  |
| On-target                           | TTATCTCTGTCCTCACAGAG               | CAAAGTCTGTGGCCTTGAC   |
| sgRNA2_1                            | TGTGTGTGGTTTGGAGGATG               | AGCCATTCTTCTGTACAGC   |
| sgRNA2_2                            | CTGAAAGCGTATAGCTATCC               | GGCCTTGGGTATGAAATGAAG |
| sgRNA2_3                            | CCACTGTTGGTGTGAGGAAG               | GCAATGCCCTCAACCTTACTC |
| sgRNA2_4                            | AGCCCTACTGTAATGCTTGG               | ATGTCATCCATCAGTCCCCG  |
| Adapter sequence for Forward primer | TACACTCTTCCCTACACGACGCTCTTCCGATCT  |                       |
| Adapter sequence for Reverse primer | GTGACTGGAGTTCAGACGTGTGCTCTTCCGATCT |                       |

**Supplemental Table S4.** Primers used in PCR 2 for library preparation.

| Name                             | Adaptador PCR2. Sequence (5' - 3')                                |
|----------------------------------|-------------------------------------------------------------------|
| TruSeq Universal Adapter_ Forwar | AATGATACGGCGACCACCGAGATCTACACTCTTTCCCTACACGACGCTCTTCCGATCT        |
| TruSeq_NB4_RNP-Ed                | CAAGCAGAAGACGGCATACGAGATGATCTGGTGAAGTGGAGTTCAGACGTGTGCTCTTCCGATCT |
| TruSeq_NB4-Cas9-Ed               | CAAGCAGAAGACGGCATACGAGATGGTCAAGTGAAGTGGAGTTCAGACGTGTGCTCTTCCGATCT |

Green nucleotides represent homolog sequence to primers for PCR 1. Indexes, which are tag sequences to mark each experiment, are showed as red nucleotides.

**Supplemental Table S5.** Primers used to amplify Cas9 cassette from hCas9 vector

| Name   | Sequence (5'-3')     |
|--------|----------------------|
| Cas9_F | TCTGCTCTGATGCCGCATAG |
| Cas9_R | CTGCGCAGATCTGCTATGGC |

**Supplemental Table S6.** Primers used to amplify targeted region in *MYBL2* and *IDH2* for T7 and RFLP assays and ICE analysis.

| Target       | Forward sequence (5'-3') | Reverse sequence (5'-3') |
|--------------|--------------------------|--------------------------|
| <i>MYBL2</i> | CTTTCCACCCCTGTAGCAGG     | CCACATGCTGCAAATGTCTCAG   |
| <i>IDH2</i>  | ACTCCAGAGCCCACACATTT     | ATGCCGGGATTACAAGTGTC     |

**Supplemental Table S7.** Primers used to detect Cas9 lentiCRISPR V2 integration in cell lines.

| Name        | Sequence (5'-3')        |
|-------------|-------------------------|
| Cell_Cas9_F | CGAGTACTTCACCGTGTATAACG |
| Cell_Cas9_R | CTCTTCGATCCGCTTCATTCTCT |

**Supplemental Table S8.** Primers sequence for U6-sgRNA-terminator cassette amplification in PX458 vector. Recognition AflIII site is indicated in italics.

| Name               | Sequence (5'-3')                 |
|--------------------|----------------------------------|
| pU6_sgRNA_F_AflIII | AGCTGCCTTAAGGGTTCCTGGCCTTTTGCTGG |
| pU6_sgRNA_R_AflIII | AGCTGCCTTAAGGGGTACCTCTAGAGCCATTG |

**Supplemental Table S9.** Results of NHEJ obtained with ICE analysis with different sgIDH2 in HEK293 cells.

| Conditions                 | sgIDH2_1 | sgIDH2_2 | sgIDH2_1 +<br>sgIDH2_2 | 250 ng PCR<br>Cas9<br>sgIDH2_1 +<br>sgIDH2_2 |
|----------------------------|----------|----------|------------------------|----------------------------------------------|
| Exp. 1                     | 20       | 10       | 14                     | 2                                            |
| Exp. 2                     | 10       | 16       | 44                     | 1                                            |
| Exp. 3                     | 5        | 8        | 13                     | 5                                            |
| Exp. 4                     | 0        | 0        | 13                     | -                                            |
| Average<br>NHEJ<br>(%±SEM) | 8.75±3.3 | 8.5±4.26 | 21±7.7                 | 2.6±1.2                                      |

**Supplemental Table S10.** Results of NHEJ obtained with ICE analysis with different optimizations in HEK293 cells.

| Conditions                 | 150 ng<br>hCas9<br>7ng<br>sgMYBL2 | 250ng<br>hCas9 12<br>ng<br>sgMYBL2 | 250 ng<br>hCas9<br>35ng<br>sgMYBL2 | 250 ng<br>hCas9<br>60ng<br>sgMYBL2 | 500 ng<br>hCas9<br>23.3 ng<br>sgMYBL2 | 250 ng<br>hCas9<br>35ng<br>sgMYBL2-<br>p | 250 ng<br>PCR Cas9<br>35ng<br>sgMYBL2 | PX458-<br>MYBL2 |
|----------------------------|-----------------------------------|------------------------------------|------------------------------------|------------------------------------|---------------------------------------|------------------------------------------|---------------------------------------|-----------------|
| Exp. 1                     | 8                                 | 16                                 | 0                                  | 18                                 | 12                                    | 8                                        | 0                                     | 8               |
| Exp. 2                     | 6                                 | 29                                 | 6                                  | 24                                 | 12                                    | 5                                        | 1                                     | 11              |
| Exp. 3                     | 13                                | 11                                 | 13                                 | 18                                 | 20                                    | 17                                       | 0                                     | 14              |
| Exp. 4                     | 0                                 | 0                                  | 14                                 | 0                                  | 0                                     | 17                                       | -                                     | 13              |
| Average<br>NHEJ<br>(%±SEM) | 6.75 ±2.7                         | 14 ±6                              | 8.25 ±3.3                          | 15 ±5.2                            | 11±4                                  | 11.75 ±3.1                               | 0.3 ±0.3                              | 11.5 ±1.3       |

**Supplemental Table S11.** NHEJ efficiencies obtained with ICE analysis in NB4-Cas9 cells using *sgIDH2* constructs or NB4 cells using RNPs.

| Conditions           | <i>sgIDH2_1</i> +<br><i>sgIDH2_2</i> | RNPs      |
|----------------------|--------------------------------------|-----------|
| Exp. 1               | 10                                   | 78        |
| Exp. 2               | 4                                    | 78        |
| Exp. 3               | 0                                    | 67        |
| Average NHEJ (%±SEM) | 4.6±2.9                              | 74.33±3.6 |

Original Images from this work

Figure 2B\_original

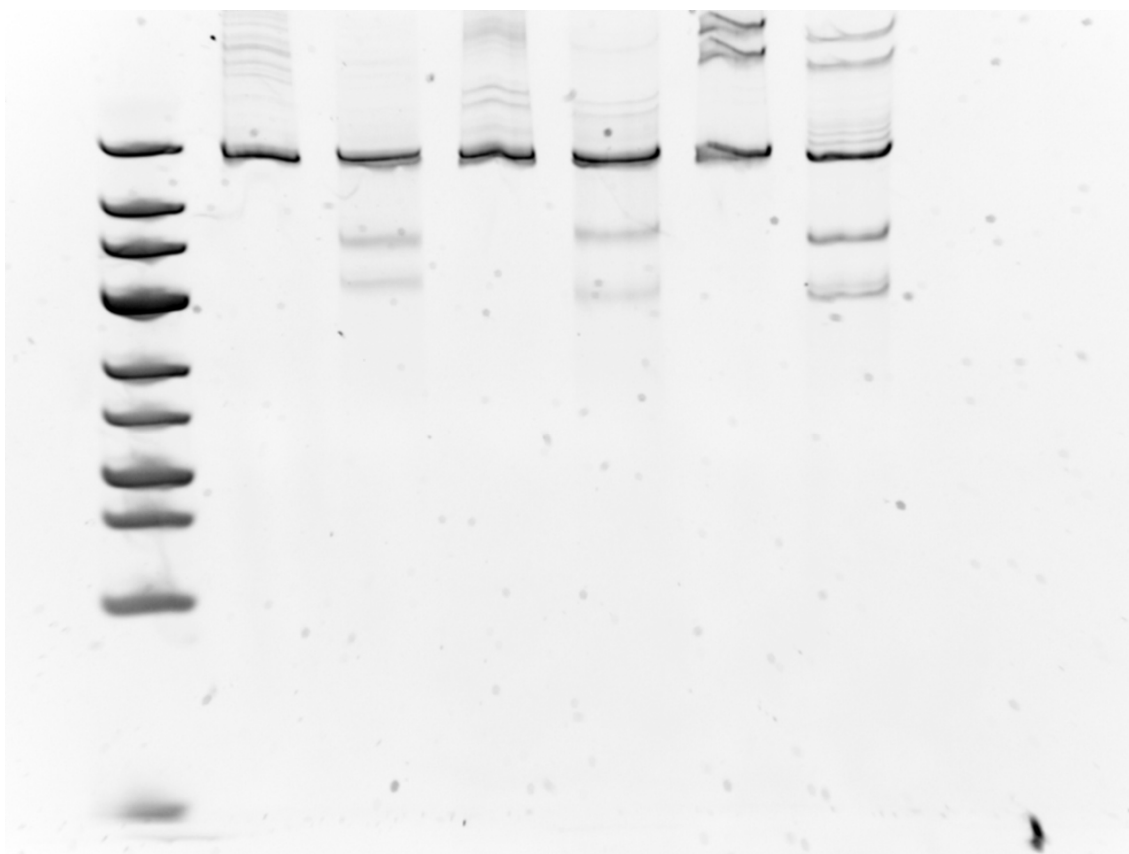

Figure 5A\_original

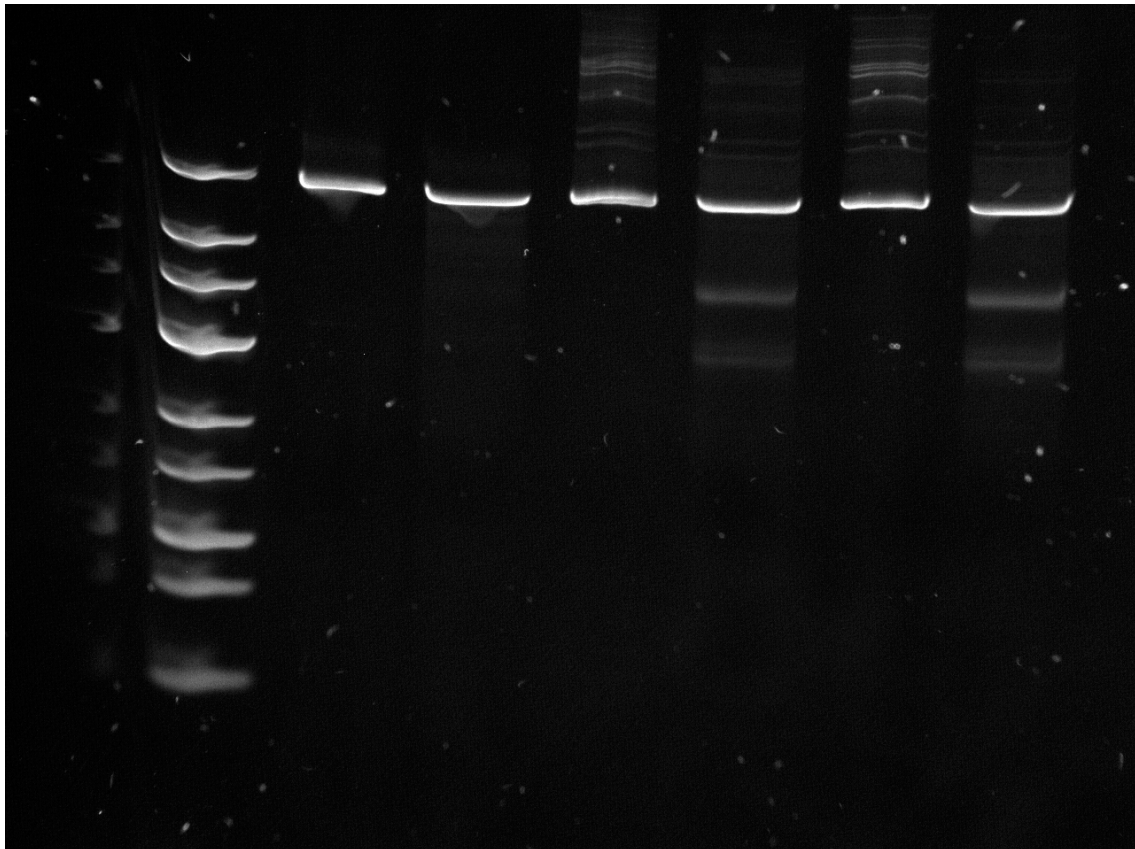

Figure 5B\_original

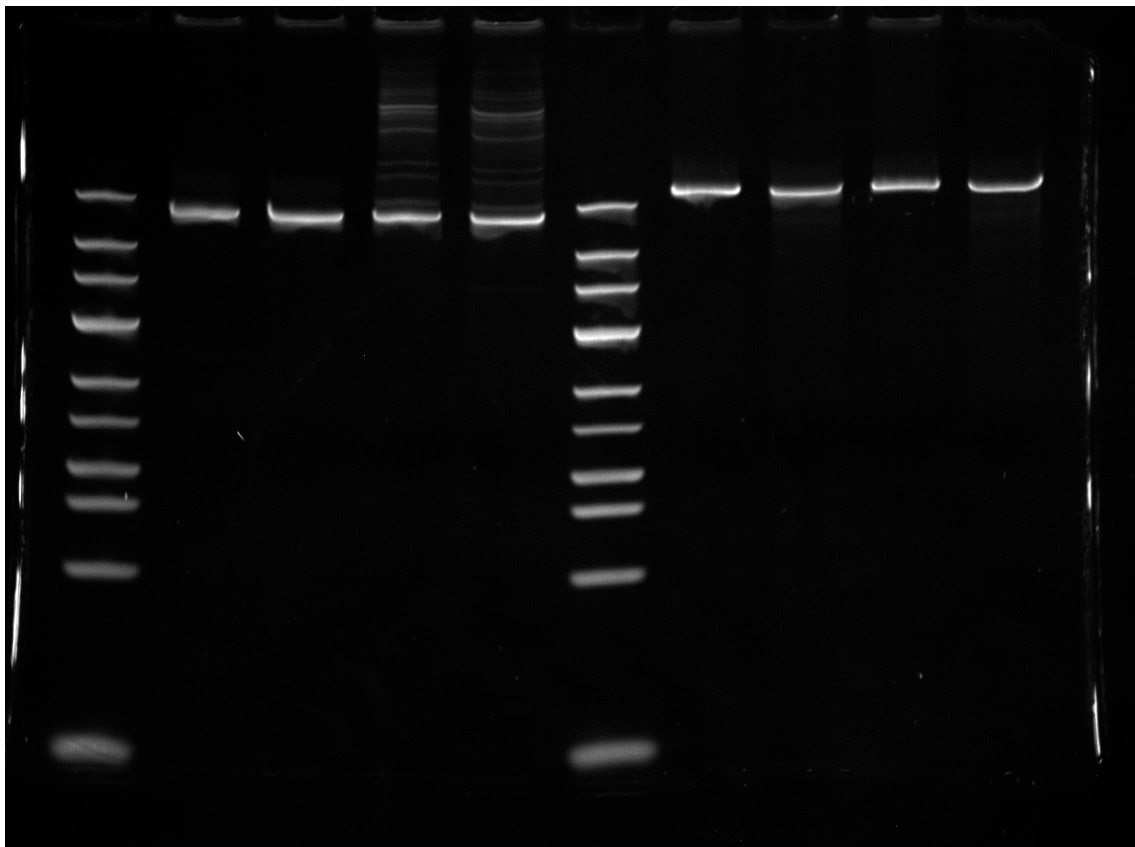

Figure 5C\_original

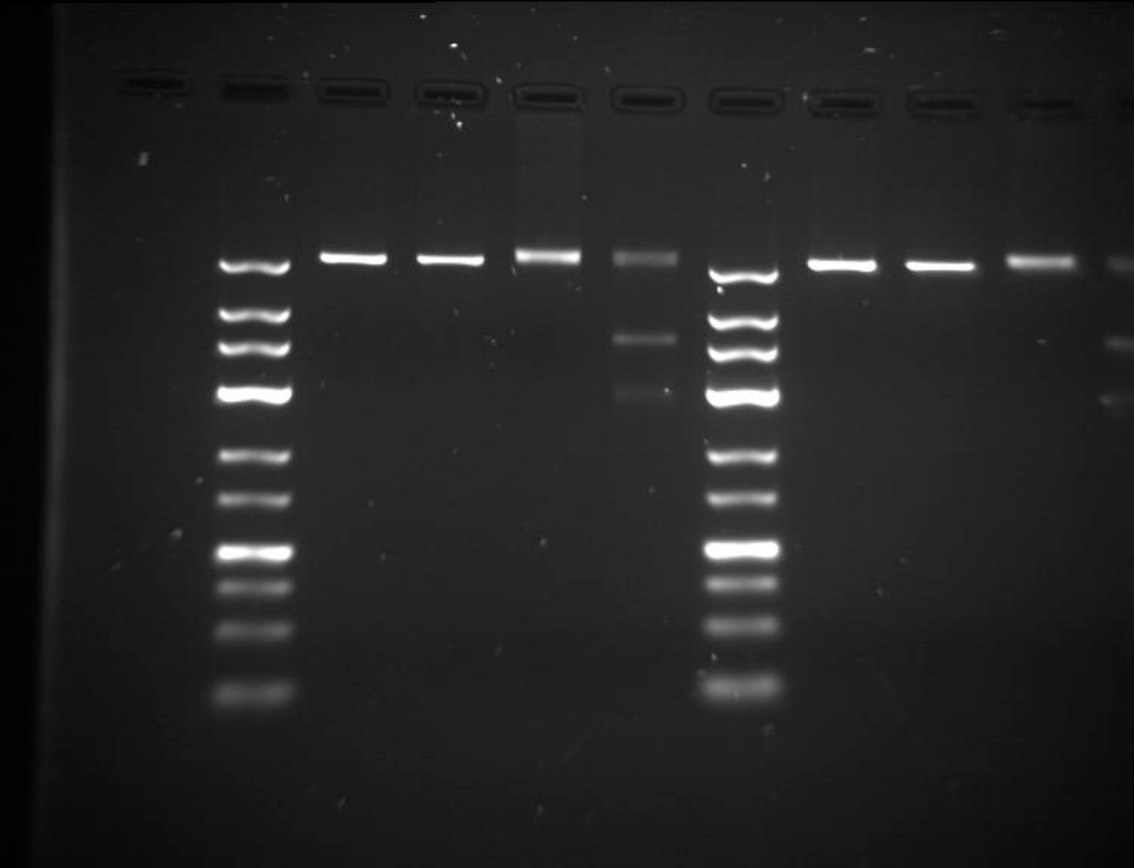

Figure 5D\_original

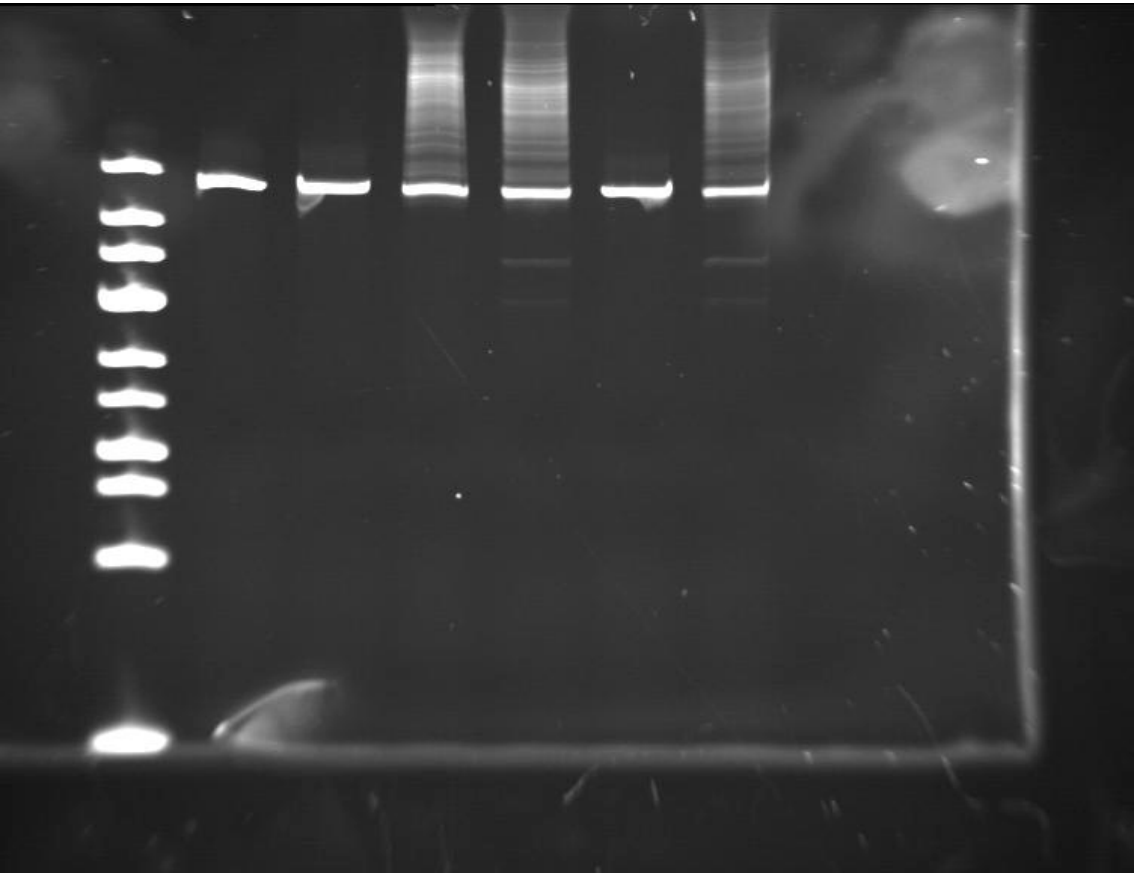

Supplement: s1 [file s1]
